# Supplementary material for: Eic1 links Mis18 with the CCAN/Mis6/Ctf19 complex to promote CENP-A assembly
Source: Open Biol. 2014 Apr 30;4(4):140043. doi: 10.1098/rsob.140043 (PMC4043117; doi:10.1098/rsob.140043)
Supplement: Subramanian-et-al_SuppInfo [file rsob140043supp1.pdf]

**Eic1 links Mis18 with the CCAN/Mis6/Ctf19 complex to promote CENP-A assembly**

Lakxmi Subramanian<sup>1</sup>, Nicholas R.T. Toda<sup>1</sup>, Juri Rappsilber<sup>1</sup> and Robin C. Allshire<sup>1,\*</sup>

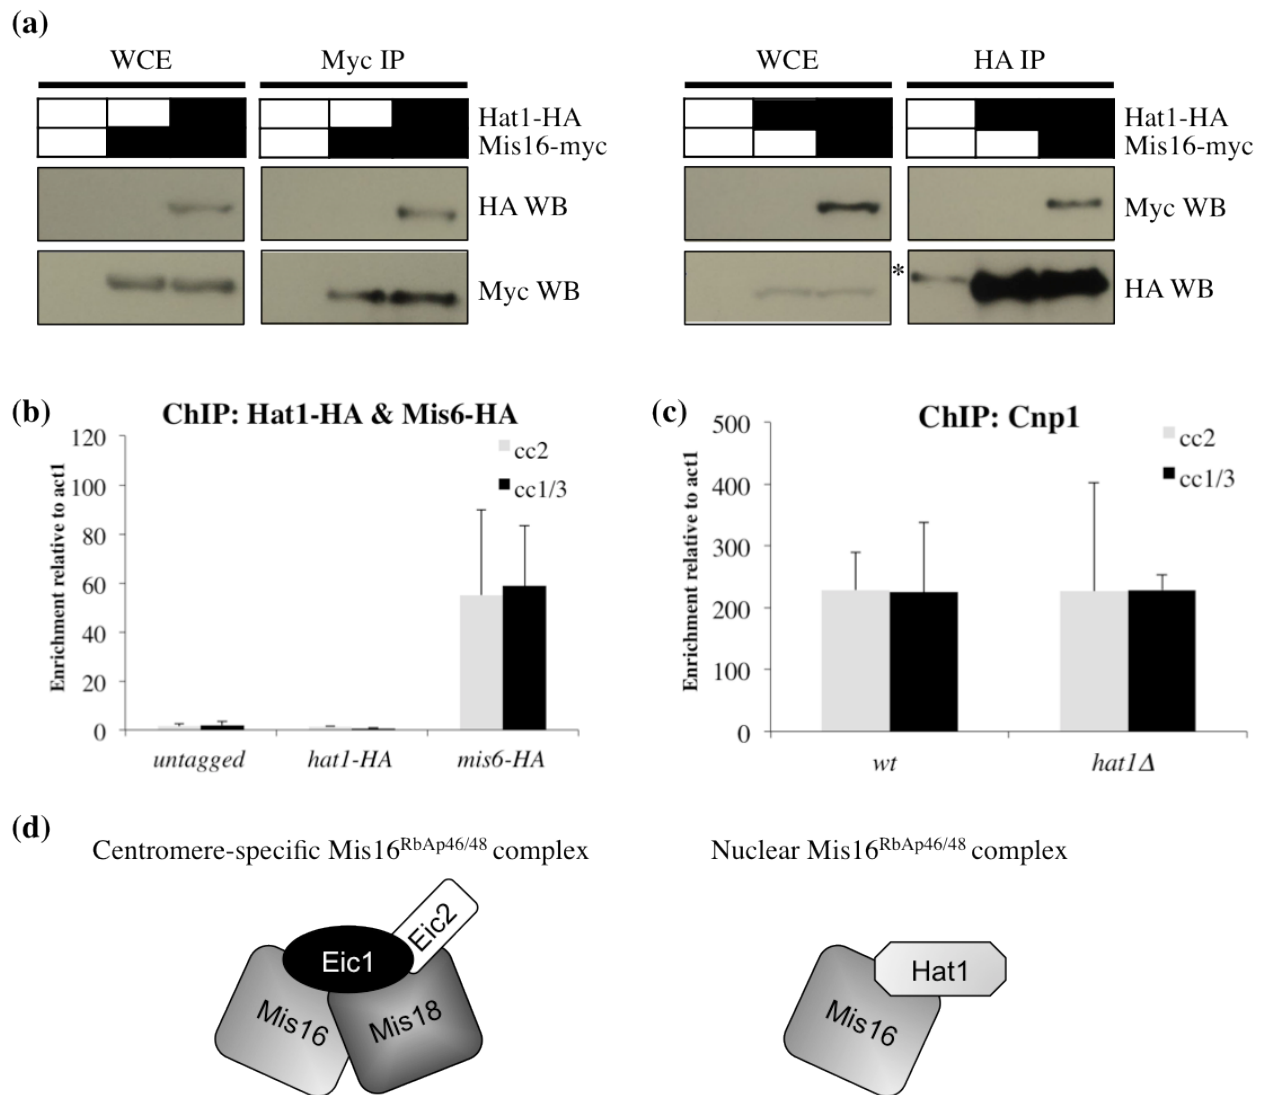

**Figure S1. Hat1 does not affect Cnp1<sup>CENP-A</sup> association with centromeres.** (a) Hat1-HA and Mis16-myc co-immunoprecipitate in reciprocal pulldowns. The asterisk (\*) in the right hand side panel denotes the IgG heavy chain. (b) Hat1-HA is undetectable at the central domain of centromeres. qChIP analyses showing enrichments of Hat1-HA and Mis6-HA at cc2 or cc1/3, relative to the *act1* locus. (c) *hat1*Δ cells display no loss of Cnp1<sup>CENP-A</sup> at centromeres. qChIP analyses of Cnp1<sup>CENP-A</sup> association with centromeres in the indicated strains. Enrichment of cc2 or cc1/3 DNA relative to the *act1* locus is presented. Error bars in panels (b) and (c) represent standard deviation between at least three biological replicates. (d) Mis16<sup>RbAp46/48/Hat2</sup> likely participates in two distinct complexes: a centromere-specific complex in association with Mis18, Eic1 and Eic2 (left) and a more general nuclear complex in association with Hat1 (right).

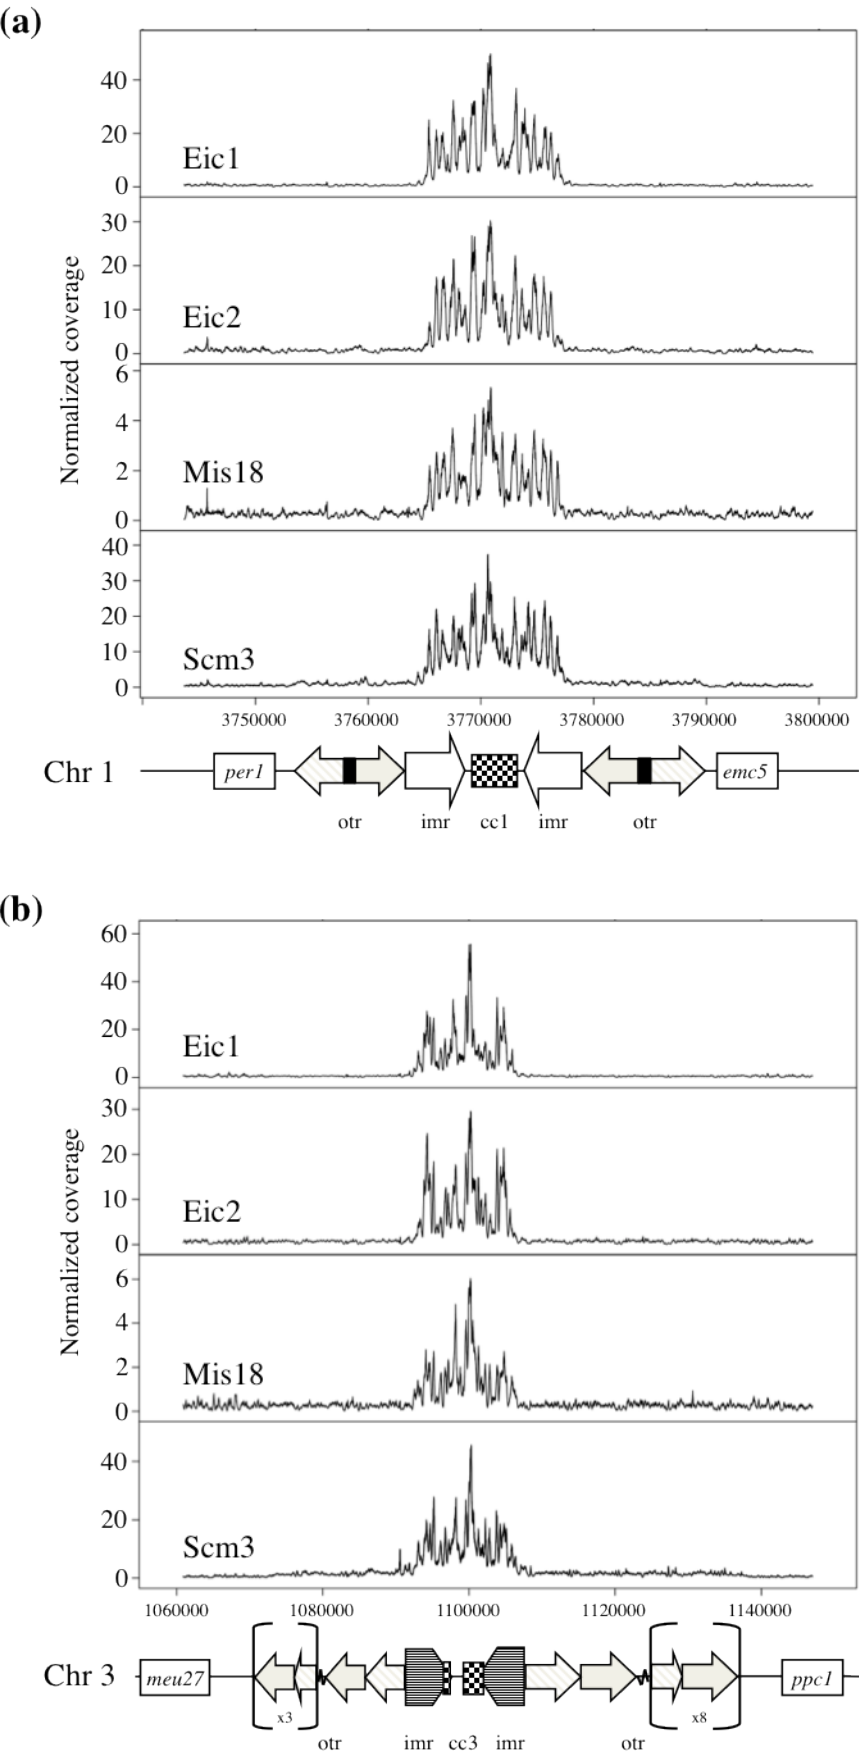

**Figure S2. Eic1 and Eic2 associate specifically with centromeres.** (a) & (b) Eic1 and Eic2 exhibit very similar genome-wide association profiles as Mis18 and Scm3<sup>HJURP</sup>, and associate specifically with the central domains of centromeres 1 & 3. The ChIP-seq profiles of GFP-tagged Eic1, Eic2, Mis18 and Scm3 across centromere 1 (a) and centromere 3 (b) are presented, alongside schematic diagrams of the respective centromeres (bottom). Normalized coverage represents the number of sequencing fragments obtained from anti-GFP IP normalized to that obtained from the input.

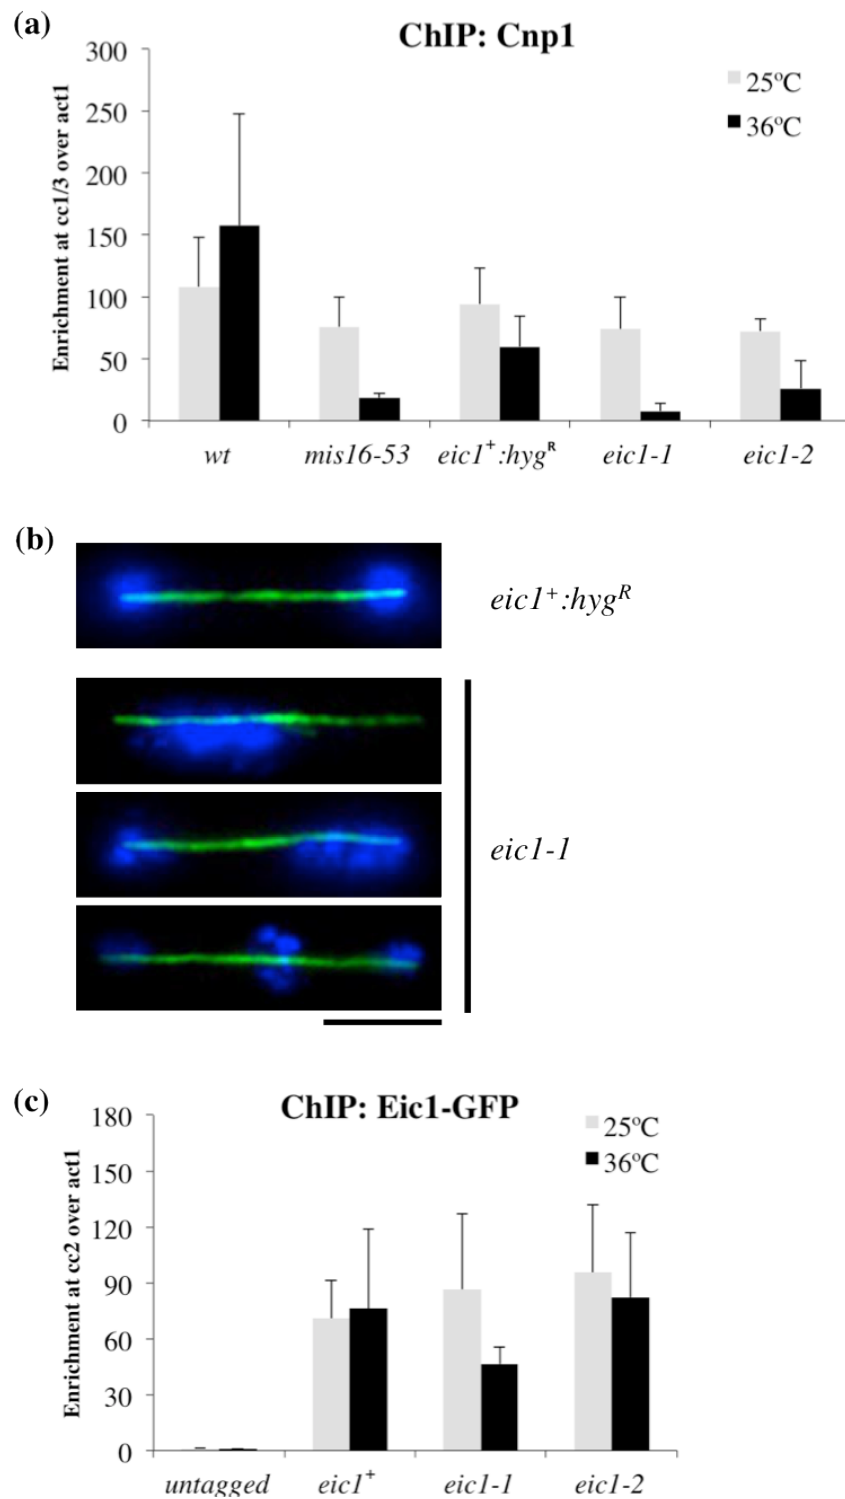

**Figure S3. Disruption of Eic1 function affects Cnp1<sup>CENP-A</sup> chromatin assembly, and causes severe defects in chromosome segregation.** (a) *eic1* mutants display reduced Cnp1<sup>CENP-A</sup> levels at centromeres. qChIP analyses of Cnp1<sup>CENP-A</sup> association with centromeres in the indicated strains when grown at permissive (25°C) vs restrictive temperature (36°C) for 8 hr. Enrichment of cc1/3 DNA relative to the *act1* locus is presented. (b) The *eic1-1* mutant exhibits severe defects in

chromosome segregation. Immunofluorescence of *eic1<sup>+</sup>:hyg<sup>R</sup>* or *eic1-1* cells shifted to restrictive temperature (36°C) for 8 hr, fixed and stained with antibodies to tubulin (TAT1) (green), and DAPI (blue). Cells shown are in anaphase. Representative images showing hypercondensed DNA, unequal DNA segregation or lagging chromosomes in *eic1-1* are presented. Scale bar, 5µm. (c) GFP tagged Eic1-1 and Eic1-2 mutant proteins associate with centromeres even at restrictive temperature (36°C). qChIP analyses of Eic1-GFP (wild-type or mutant) association with centromeres in the indicated strains when grown at permissive (25°C) vs restrictive temperature (36°C) for 8 hr. Enrichment of cc2 DNA relative to the *act1* locus is presented. Error bars in panels (a) and (c) represent standard deviation between at least three biological replicates.

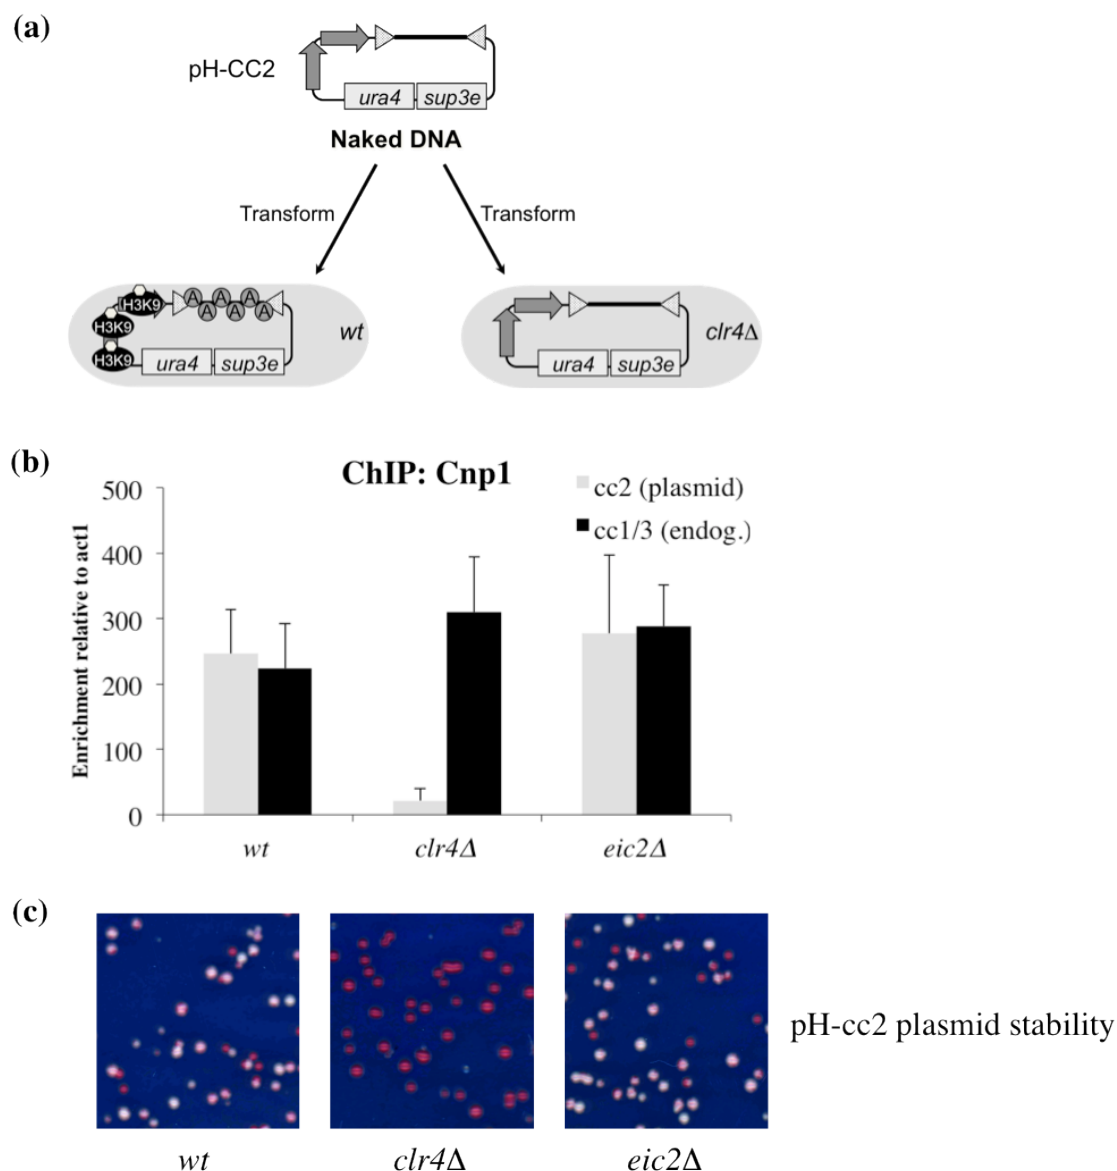

**Figure S4. Eic2 is dispensable for Cnp1<sup>CENP-A</sup> establishment on naïve centromeric DNA.** (a) A schematic representation of the Cnp1<sup>CENP-A</sup> establishment assay on the centromeric pH-cc2 plasmid [38]. (b) Cnp1<sup>CENP-A</sup> establishment is unaffected in *eic2Δ* cells. qChIP analyses of Cnp1<sup>CENP-A</sup> association with the centromeric plasmid pH-cc2 and endogenous centromeres, in the indicated strains transformed with pH-cc2. Enrichment of cc2 (plasmid) or cc1/3 (endogenous) DNA relative to the *act1* locus is presented. Error bars represent standard deviation between at least three biological replicates. (c) Centromeric plasmid stability is retained even in the absence of Eic2. An aliquot of cells used in (b) were plated on YES media supplemented with 1/10<sup>th</sup> adenine to assess plasmid loss. *eic2Δ* cells do not show any obvious defects in plasmid stability, they form sectorized colonies at a high frequency much like wild-type.

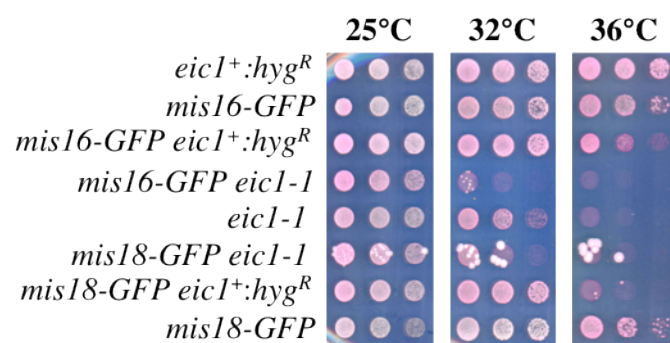

**Figure S5. *mis16-GFP* & *mis18-GFP* exhibit synthetic genetic interactions with *eic1*.** Five-fold serial dilutions of the indicated cells spotted on YES+Phloxine B media and incubated at the indicated temperatures; dead cells stain dark pink.

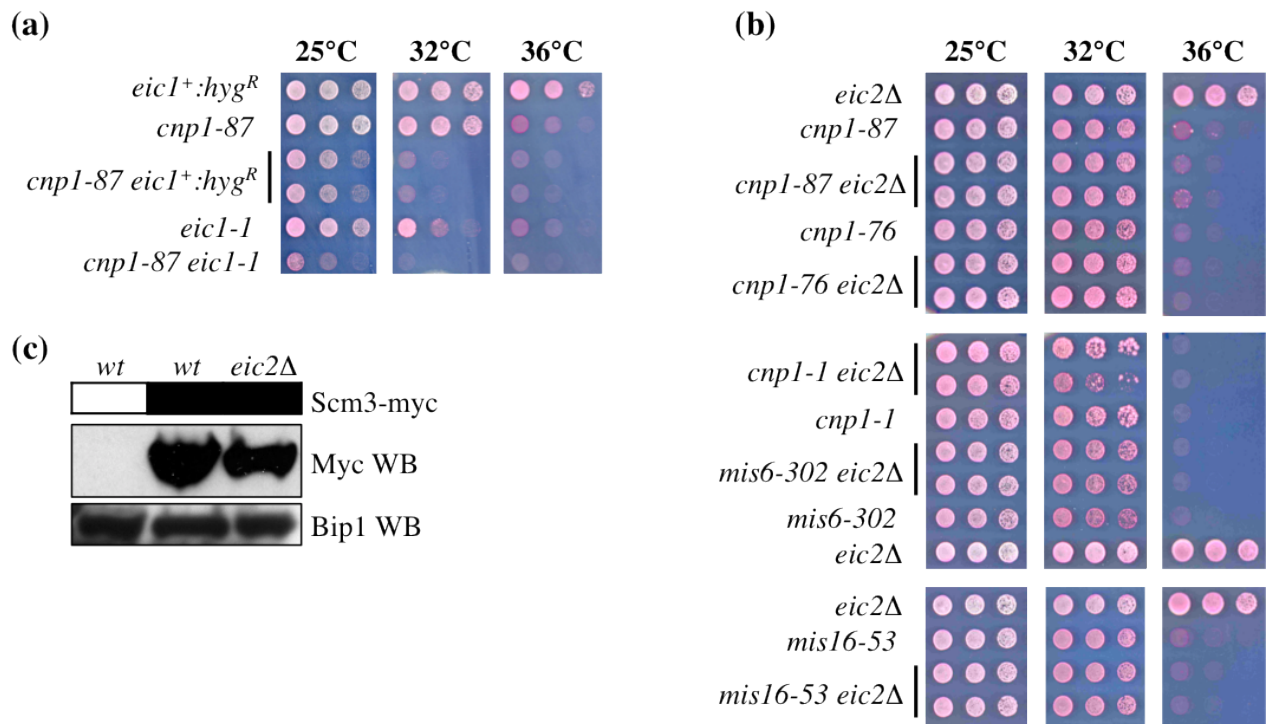

**Figure S6. Analysis of genetic interactions between *eic1* or *eic2* mutants and mutations in *Cnp1*<sup>CENP-A</sup> or *Cnp1*<sup>CENP-A</sup> assembly factors.** (a) *eic1-1* cells display reduced growth when combined with *cnp1-87*. (b) *eic2Δ* cells display no obvious growth defects when combined with mutations in *cnp1*, *mis6* or *mis16*. Five-fold serial dilutions of cells spotted on YES+Phloxine B media and incubated at the indicated temperatures; dead cells stain dark pink. (c) Scm3-myc protein levels remain unaffected in *eic2Δ* cells. Whole cell extracts of the indicated strains were resolved on an SDS-PAGE gel and subjected to Western analysis using either an anti-Myc (top) or an anti-Bip1 antibody (bottom).

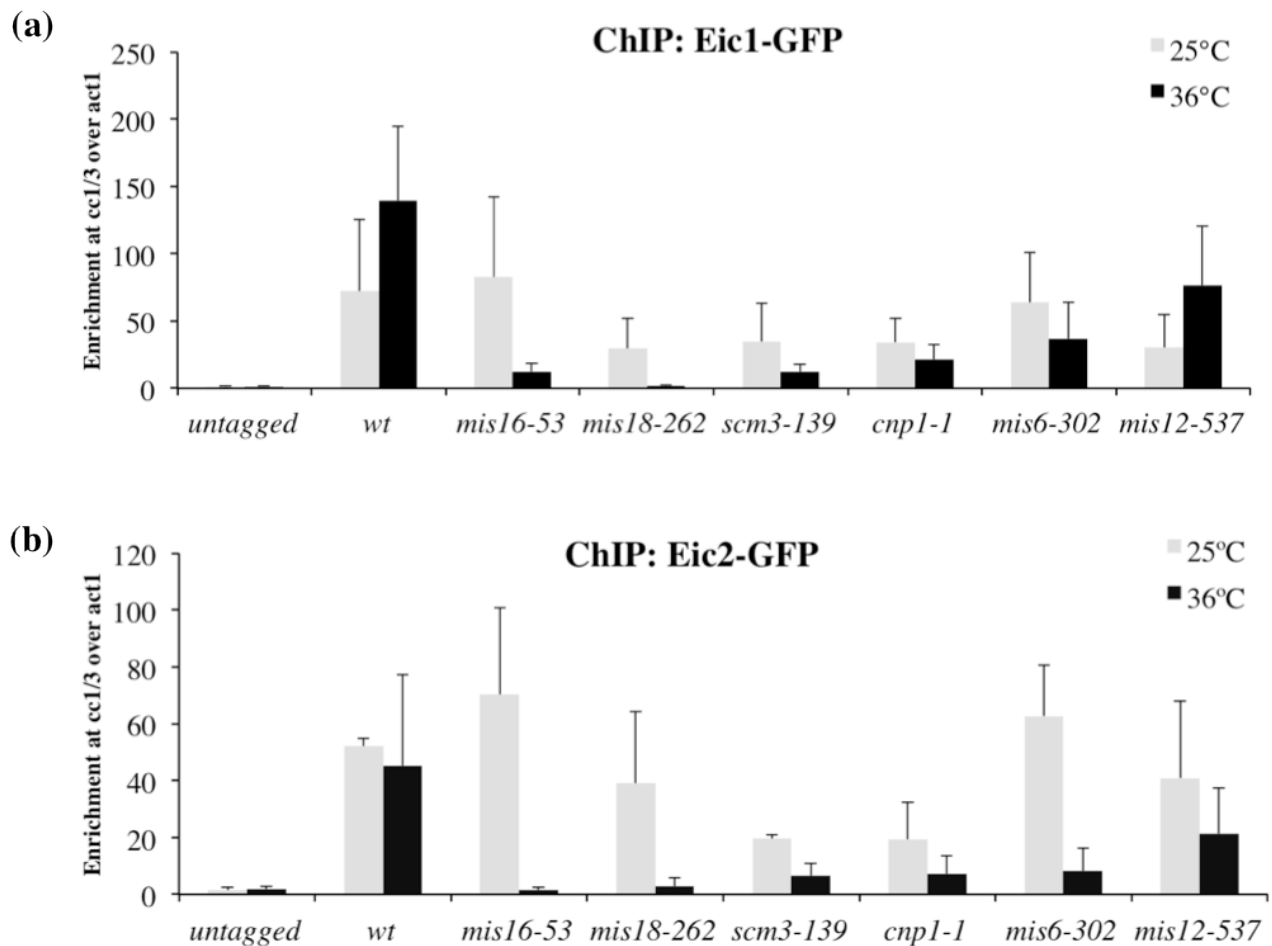

**Figure S7. Eic1 and Eic2 depend on distinct Cnp1<sup>CENP-A</sup> assembly factors for their association with centromeres.** (a) Eic1 association with centromeres is dependent on Mis18, Mis16<sup>RbAp46/48/Hat2</sup> and Scm3<sup>HJURP</sup>, but is largely independent of Cnp1<sup>CENP-A</sup>, Mis6<sup>CENP-I/Ctf3</sup> and Mis12. qChIP analyses of Eic1-GFP association with centromeres in the indicated strains when grown at permissive (25°C) vs restrictive temperature (36°C) for 8 hr. (b) Eic2 association with centromeres is dependent on Mis18, Mis16<sup>RbAp46/48/Hat2</sup>, Scm3<sup>HJURP</sup>, Cnp1<sup>CENP-A</sup>, Mis6<sup>CENP-I/Ctf3</sup> and Mis12. qChIP analyses of Eic2-GFP association with centromeres in the indicated strains when grown at permissive (25°C) vs restrictive temperature (36°C) for 8 hr. Enrichment of cc1/3 DNA relative to the *act1* locus is presented. Error bars represent standard deviation between at least three biological replicates.
